# Supplementary material for: Graphitic Carbon Nitride Nanosheets Decorated Zinc-Cadmium Sulfide Type-II Heterojunction for Photocatalytic Hydrogen Production
Source: Preprints.org preprint supplement (doi:10.20944/preprints202308.0977.v1), 2023-08-14
Supplement: Supplementary file 1 [file supplementary]

**Electronic Supporting Information**

**Graphitic Carbon Nitride Nanosheets Decorated Zinc-Cadmium Sulfide Type-II Heterojunctions for Photocatalytic Hydrogen Production**

Ammar Bin Yousaf,1† Muhammad Imran,2† Muhammad Farooq,3,* Samaira Kausar,4 Samina Yasmeen,4 and Peter Kasak,1,*

1 Center for Advanced Materials, Qatar University, Doha 2713, Qatar

2 Hefei National Laboratory for Physical Sciences at Microscale, University of Science and Technology of China, Hefei, Anhui 230026, PR China

3 Interdisciplinary Graduate School of Science and Technology,, Shinshu University, Ueda 386-8567, Japan

4 Department of Chemistry, National Science College, Satellite Town, Gujranwala 52250, Pakistan

† : These two authors contributed equally.

*Corresponding Authors E-mails: [mufaroouk@gmail.com](mailto:mufaroouk@gmail.com), [20hs109g@shinshu-u.ac.jp](mailto:20hs109g@shinshu-u.ac.jp) (Muhammad Farooq), [peter.kasak@qu.edu.qa](mailto:peter.kasak@qu.edu.qa) (Peter Kasak)

S1 Materials and Methods

S1.1. Chemicals

Melamine (C3H6N6), sodium hydroxide (NaOH), zinc acetate [Zn(OAc)2], cadmium acetate [Cd(OAc)2], sodium sulfide nonahydrate [Na2S·9H2O], and sodium sulfite (Na2SO3) of analytical grade puritywere purchased from Sigma-Aldrich and used as received without further purification.

S1.2. Characterization

The structure and morphology of the as-synthesized samples were analyzed by transmission electron microscope (TEM, JEM-2100F, 200kV accelerating voltage). The crystal phase of the samples was measured by powder X-ray diffraction (XRD) measurements with a Philips X’Pert Pro Super diffractometer with Cu-Kα radiation (λ = 1.54178 Å) at an operating voltage of 40 kV and current of 200 mA. The elemental composition of the prepared catalyst was determined using X-ray photoelectron spectroscopy (XPS) analysis (PerkinElmer RBD). The UV−vis diffuse reflectance spectra (DRS) for band gap calculation and absorption behavior were recorded with a Shimadzu spectrophotometer (2501 PC model) in the 200 to 800 nm region. Photoelectrochemical tests were performed with a CHI-660B potentiostat (Chenhua Instrument Co., Shanghai, China) with a three-electrode setup (modified Ti foil as the working electrode, Ag/AgCl as the reference electrode, and Pt wire as the counter electrode) in 0.1 M Na2SO4 solution. The electrochemical impedance spectroscopy (EIS) was recorded with −0.6 V bias, and the frequency ranged from 1 Hz to 100 kHz with an alternating current signal amplitude of 5 mV.





**Figure S1:** Low resolution TEM image of *g*-C3N4‒ZnCdS catalyst.


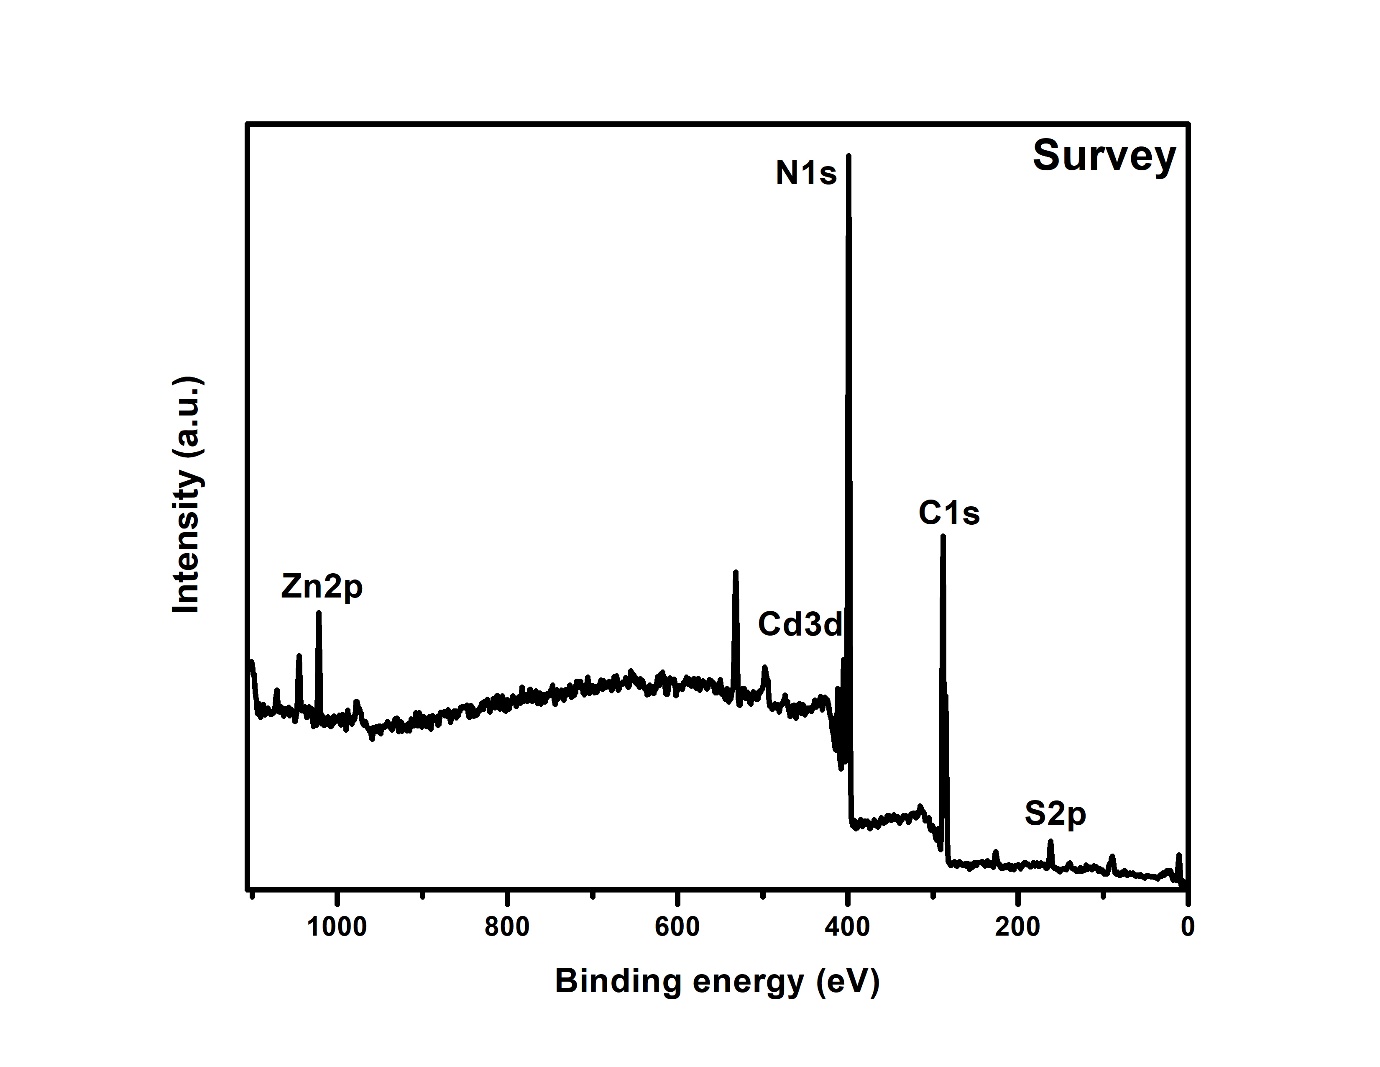


**Figure S2:** XPS full scan survey for *g*-C3N4‒ZnCdS catalyst.
